# Supplementary material
Source: MDPI journal article supplement (https://www.mdpi.com/2073-4352/12/3/353)
Supplement: s1 [file s1]

**Supporting Information to:**

**Synthesis, X-ray Single Crystal Analysis and Anticancer Activity Evaluation of New Alkylsulfanyl-Pyridazino[4,5-b]indole Compounds as a Multi-Target Inhibitors for EGFR and Its down Streaming PI3K/AKT**

**Eid E. Salama <sup>1,2,\*</sup>, Ibrahim O. Althobaiti <sup>1</sup>, Matti Haukka <sup>3</sup>, Ahmed T. A. Boraei <sup>2,\*</sup>**

<sup>1</sup> Chemistry Department, College of Science and Arts, Jouf University, Qurayyat, Kingdom of Saudi Arabia

<sup>2</sup> Chemistry Department, Faculty of Science, Suez Canal University, Ismailia 41522, Egypt

<sup>3</sup> Department of Chemistry, University of Jyväskylä, P.O. Box 35, FI-40014 Jyväskylä, Finland;  
matti.o.haukka@jyu.fi (M.H.)

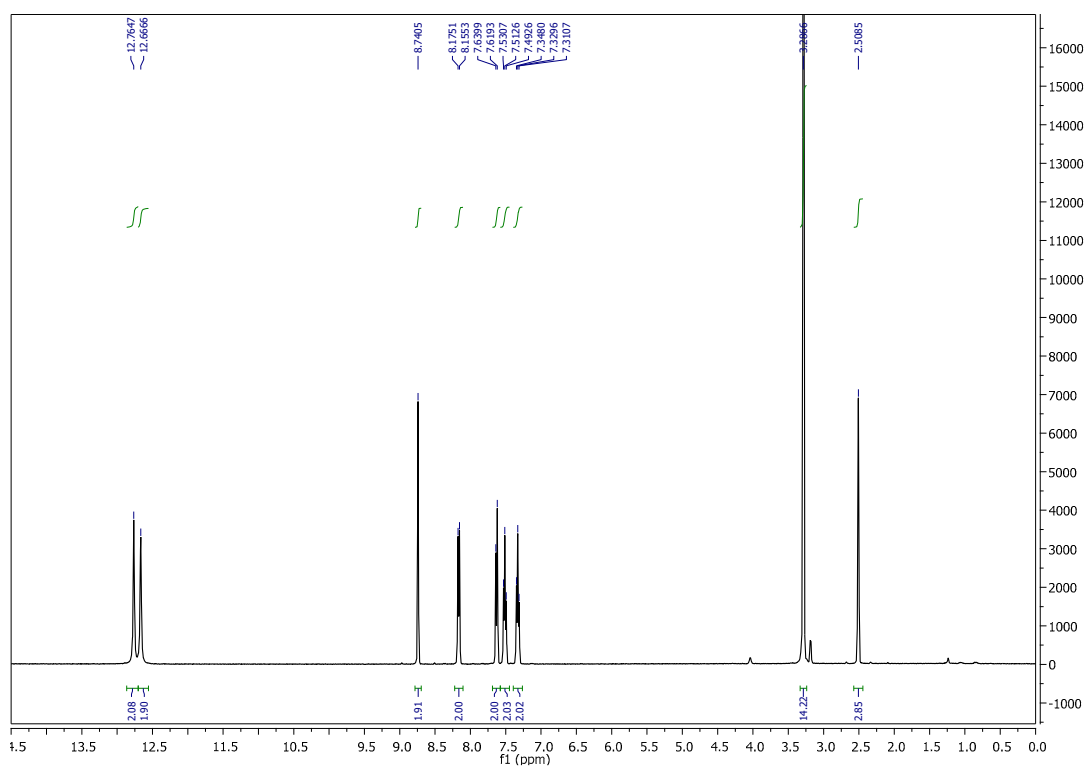

**Figure S1.  $^1\text{H}$  NMR of 2.**

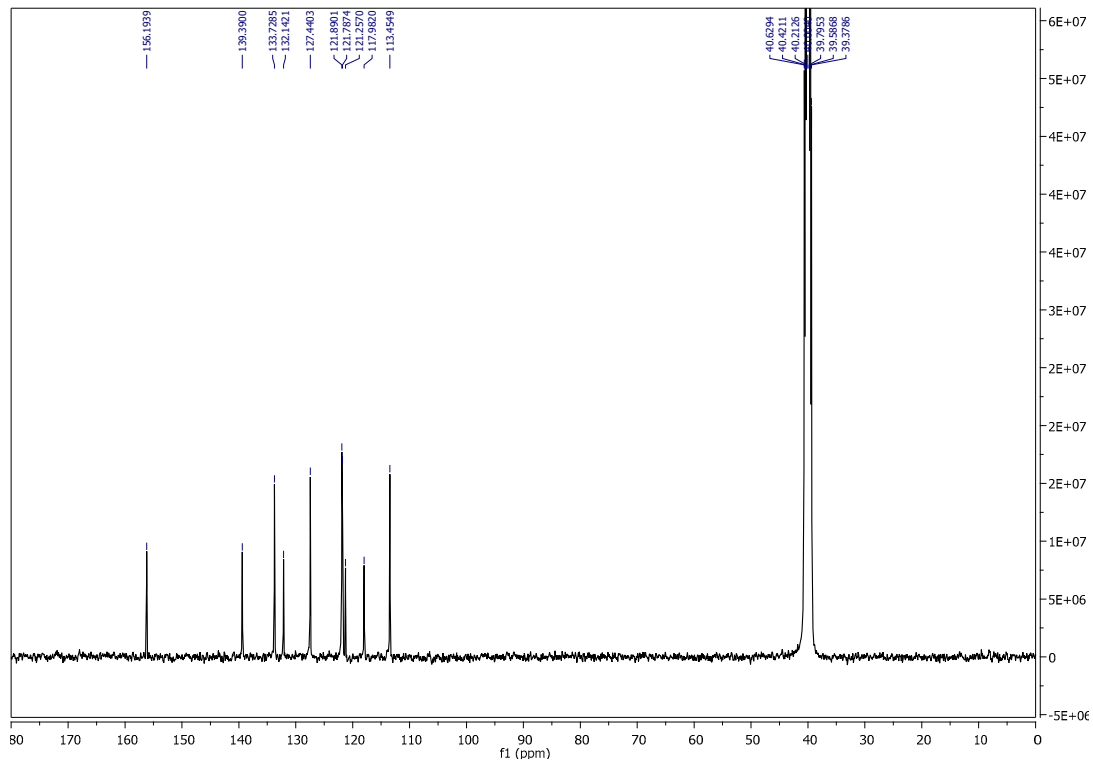

**Figure S2.  $^{13}\text{C}$  NMR of 2.**

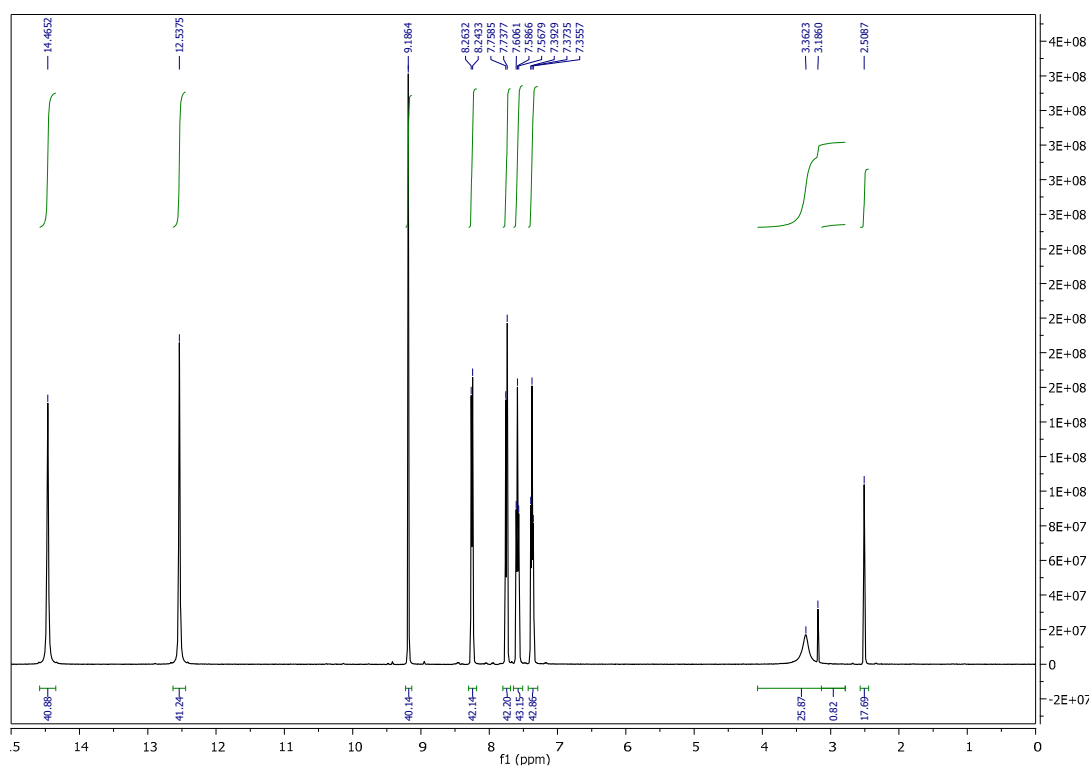

**Figure S3.  $^1\text{H}$  NMR of 3.**

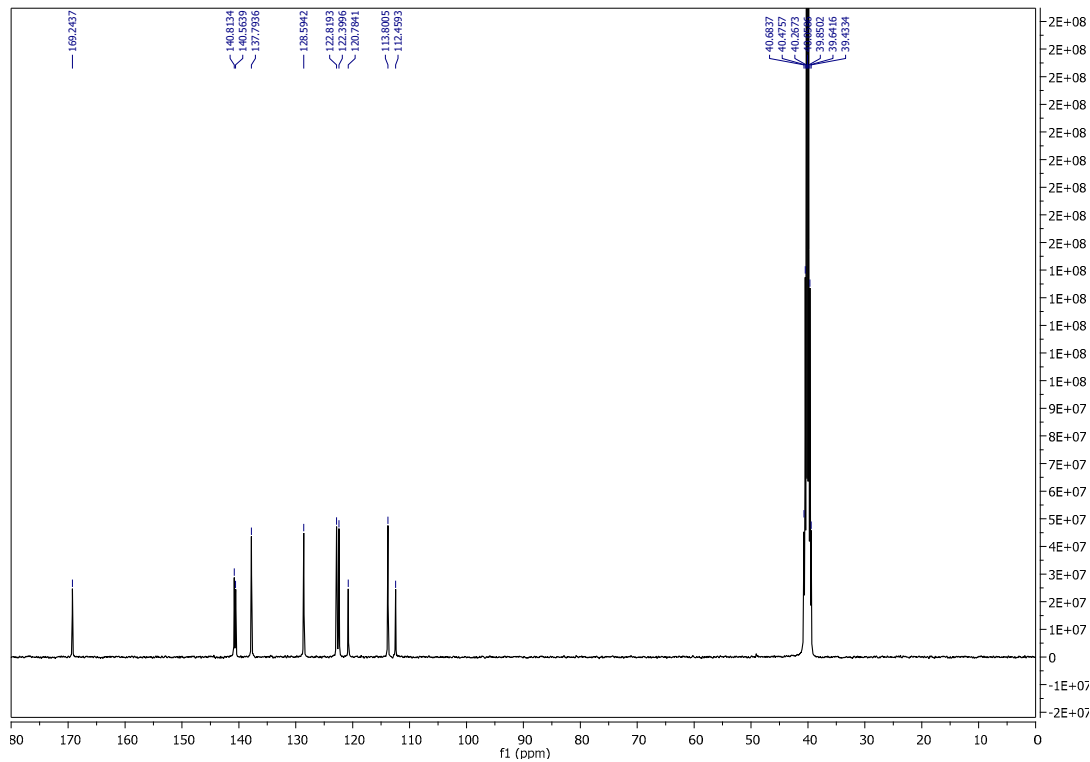

**Figure S4.  $^{13}\text{C}$  NMR of 3.**

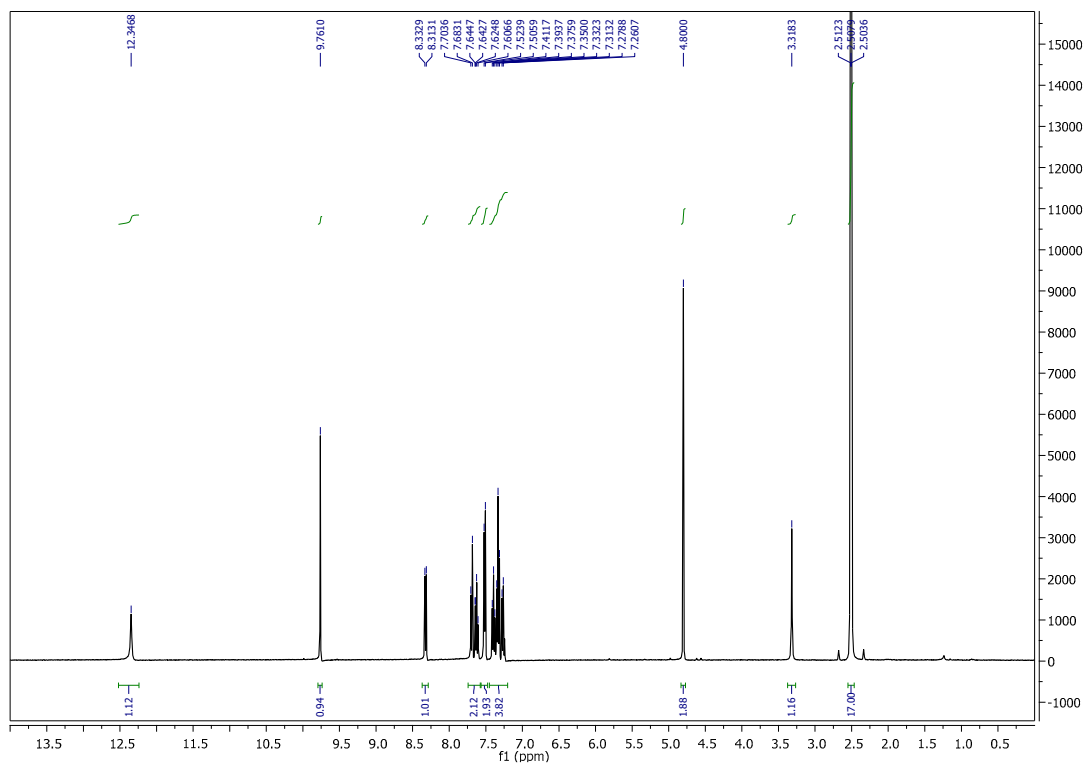

Figure S5. <sup>1</sup>H NMR of 4.

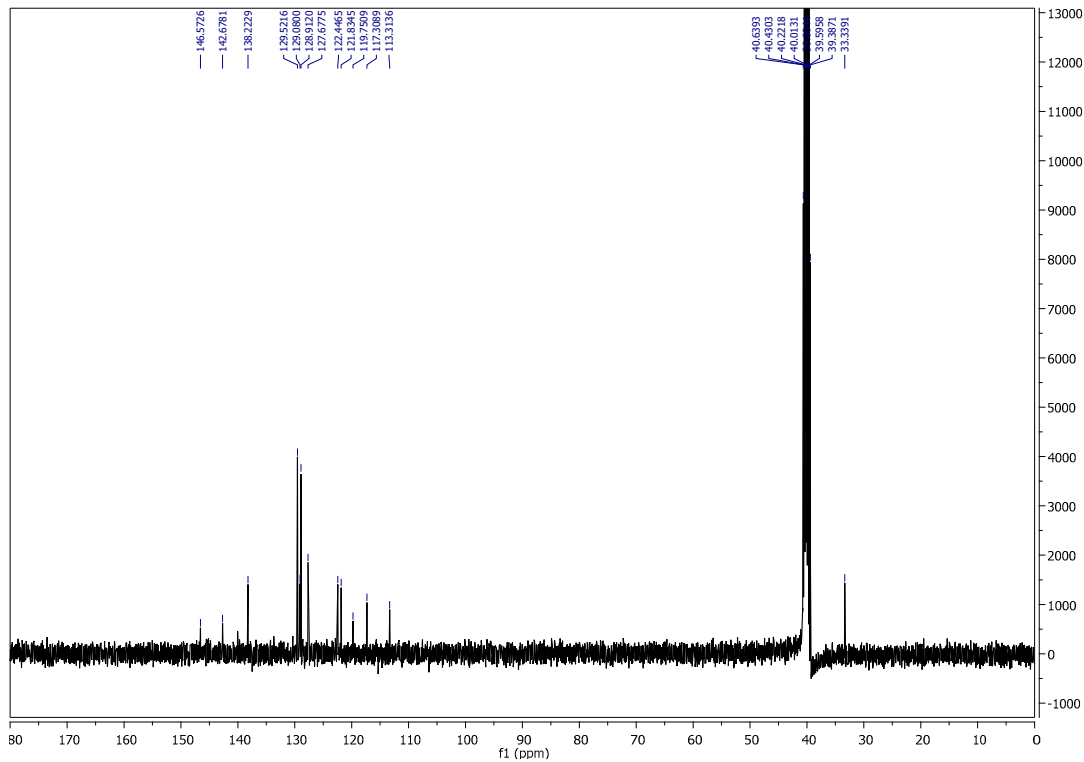

Figure S6. <sup>13</sup>C NMR of 4.

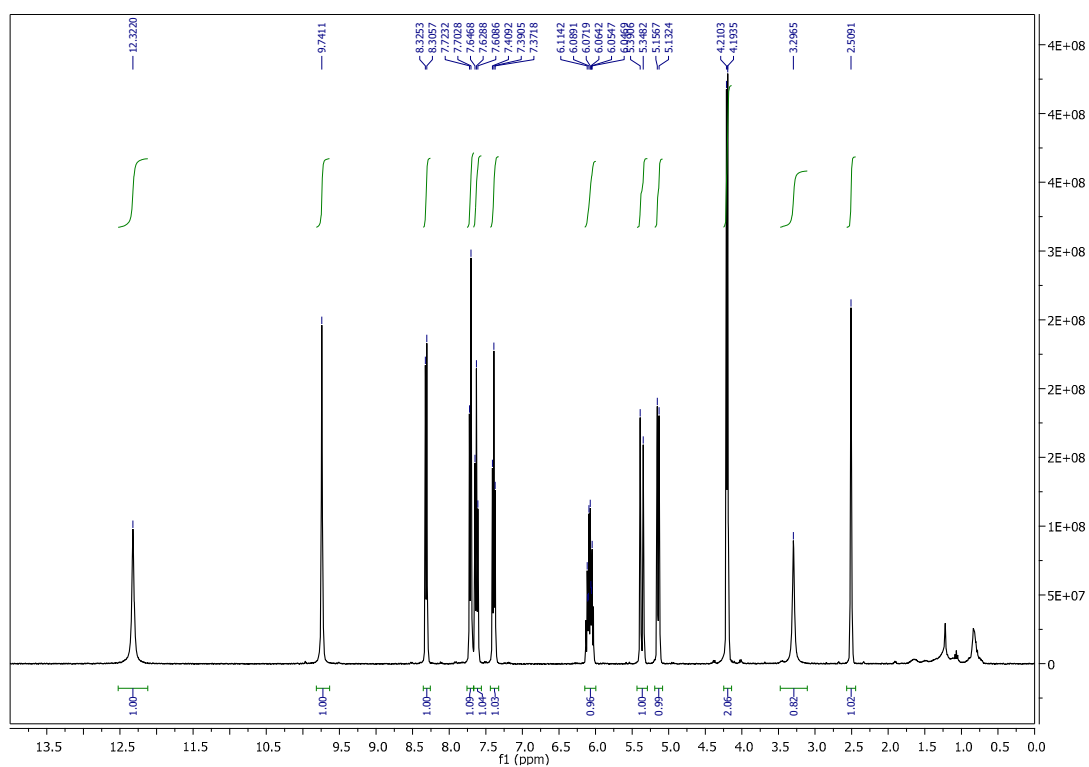

Figure S7. <sup>1</sup>H NMR of 5.

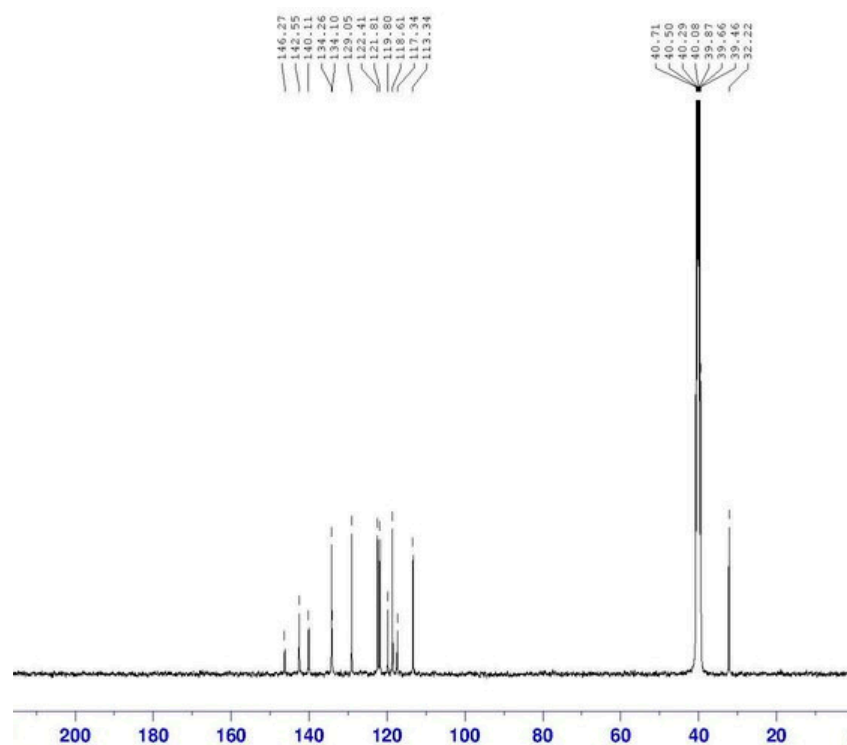

Figure S8. <sup>13</sup>C NMR of 5.

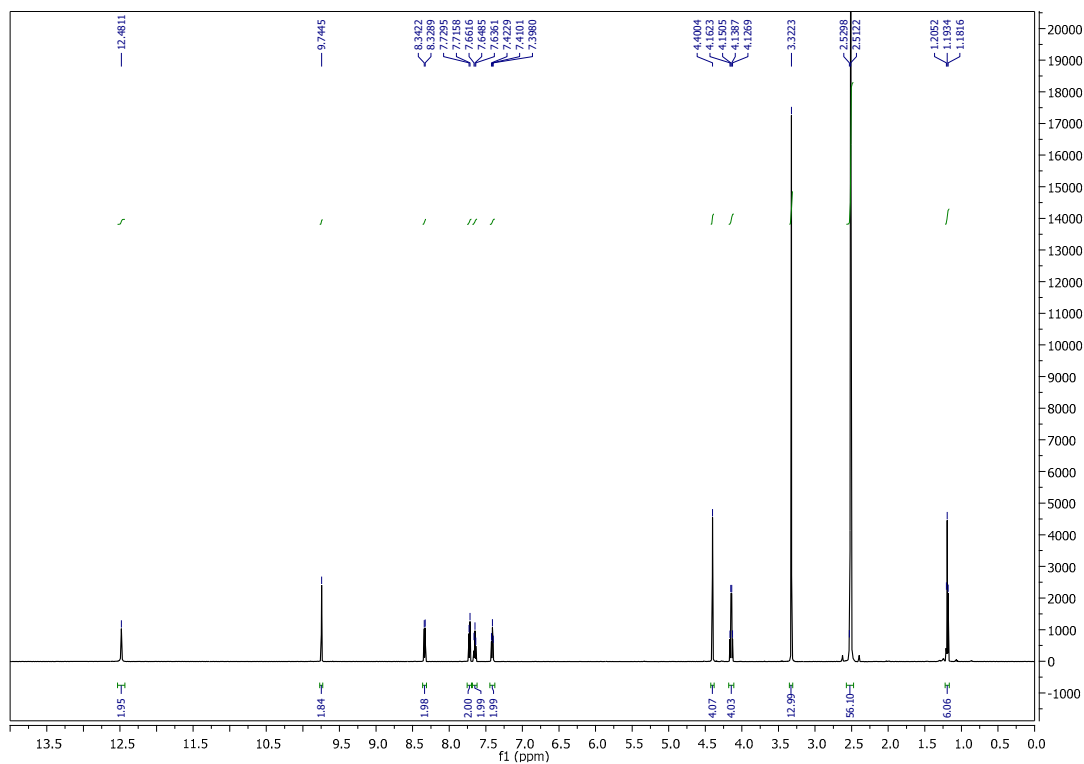

Figure S9. <sup>1</sup>H NMR of 6.

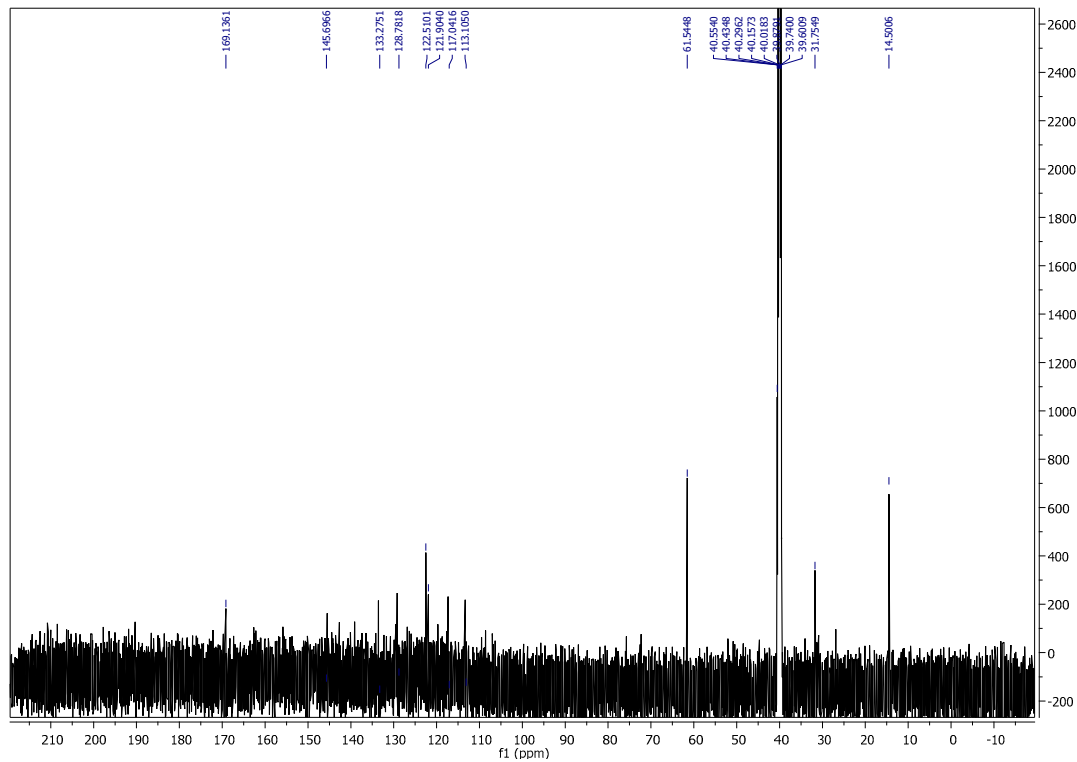

Figure S10. <sup>13</sup>C NMR of 6.

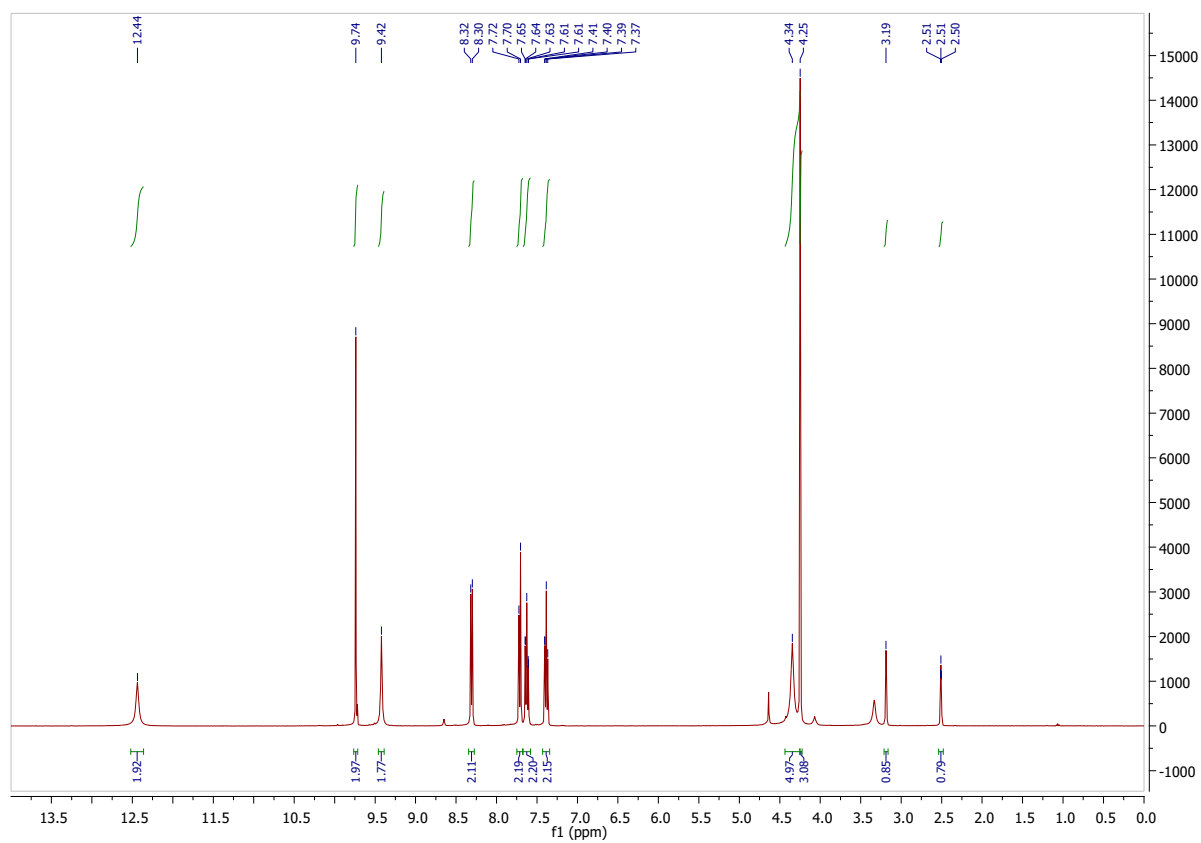

**Figure S11.** <sup>1</sup>H NMR of 7.

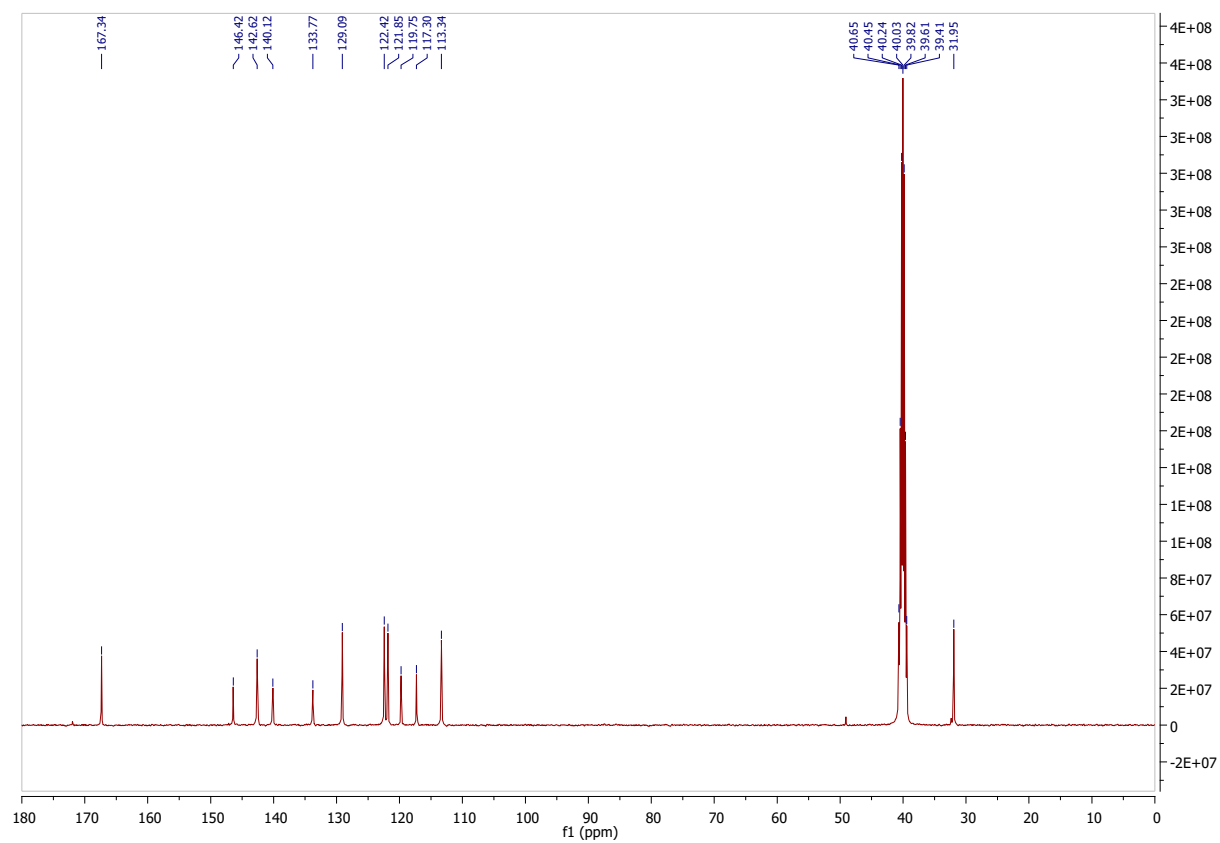

**Figure S12.** <sup>13</sup>C NMR of 7.
